# Supplementary material for: Ni3S2/Co3S4 with controlled surface electron arrangement for high-performance aqueous energy storage
Source: Royal Society of Chemistry journal article supplement (doi:10.1039/d3ta06812a), 2024-01-01
Supplement: d3ta06812a1.pdf [file d3ta06812a1.pdf]

Supporting Information

**Ni<sub>3</sub>S<sub>2</sub>/Co<sub>3</sub>S<sub>4</sub> with controlled surface electron arrangement for high-performance aqueous  
energy storage**

Miaomiao Liang<sup>a</sup>, Zhenyang Li<sup>a</sup>, Yongxia Kang<sup>a</sup>, Xiaoliang Zhao<sup>a</sup>, Xiaozhe Zhang<sup>a</sup>, Hemeng  
Zhang<sup>a</sup>, Haiyang Wang<sup>b,\*</sup>, Zongcheng Miao<sup>b,c,\*</sup>, Chong Fu<sup>a,\*</sup>

<sup>a</sup>School of Materials Science and Engineering, Xi'an Key Laboratory of Textile Composites,  
Xi'an Polytechnic University, Xi'an, 710048, China

<sup>b</sup>School of Artificial Intelligence, Optics and Electronics (iOPEN), Northwestern Polytechnical  
University, Xi'an, 710072, Shaanxi, China

<sup>c</sup>Technological Institute of Materials & Energy Science (TIMES), Xi'an Key Laboratory of  
Advanced Photo-electronics Materials and Energy Conversion Device, Xijing University,  
Xi'an, 710123, China

E-mail addresses: why0224@126.com; miaozongcheng@nwpu.edu.cn; fuchong69@163.com

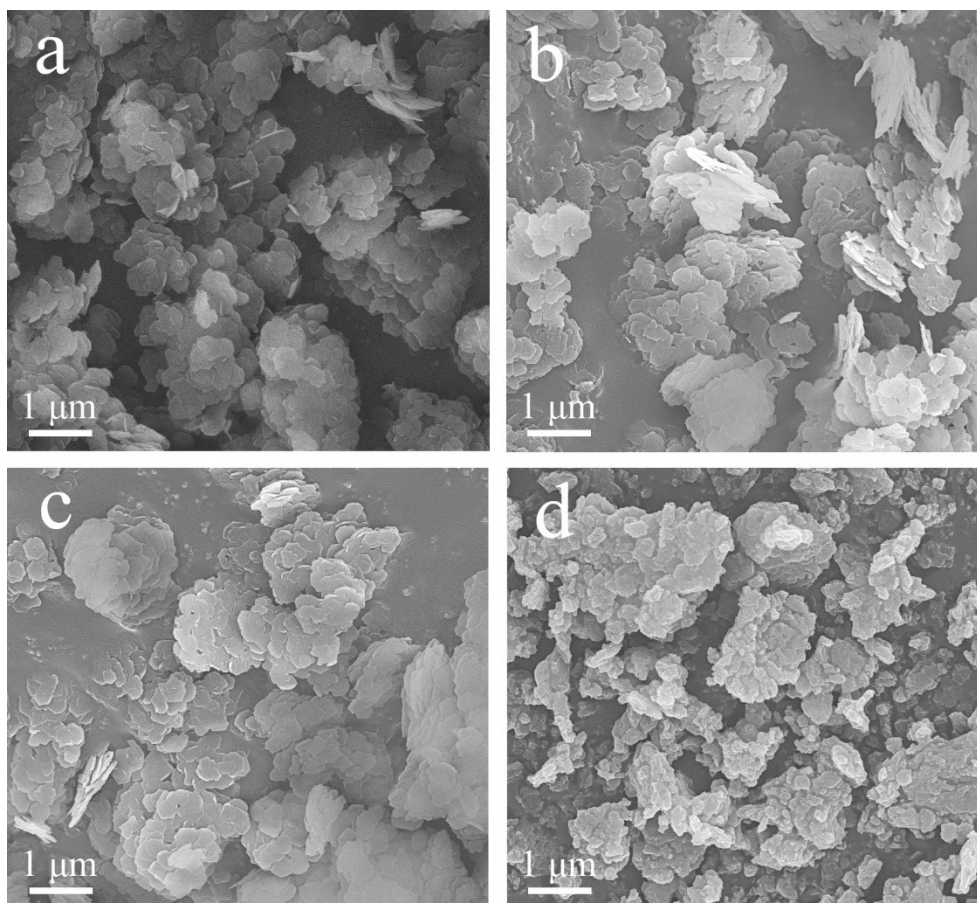

Fig. S1 SEM images of (a)  $\text{Co}_5(\text{O}_{9.48}\text{H}_{8.52})\text{NO}_3$ , (b)  $\text{Ni}/\text{Co}_5(\text{O}_{9.48}\text{H}_{8.52})\text{NO}_3$ , (c)  $\text{Ni}_3\text{S}_2/\text{Co}_3\text{S}_4$ , (d)  $\text{Ni}_3\text{S}_2/\text{Co}_3\text{S}_4\text{-Sv}$ , respectively under low magnifications.

Table S1 The specific ICP results of  $\text{Ni}_3\text{S}_2/\text{Co}_3\text{S}_4\text{-Sv}$  sample

| Sample Name                                             | Mass $m_0$ (g) | Constant Volume $V_0$ (mL) | Test Element | Concentration of tested element in solution $C_0$ (mg/L) | Dilution factor $f$ | Element concentration in original decomposition reagent $C_1$ (mg/L) | Element Content $C_x$ (mg/kg) | Average Value (mg/kg) | %     |
|---------------------------------------------------------|----------------|----------------------------|--------------|----------------------------------------------------------|---------------------|----------------------------------------------------------------------|-------------------------------|-----------------------|-------|
| $\text{Ni}_3\text{S}_4/\text{Co}_3\text{S}_4\text{-Sv}$ | 0.02070        | 50                         | Co           | 4.3564                                                   | 50                  | 217.82000                                                            | 526135.27                     | 5.23E+05              | 52.3% |
|                                                         | 0.02045        | 50                         |              | 4.2597                                                   | 50                  | 212.98500                                                            | 520745.72                     |                       |       |
|                                                         | 0.02070        | 50                         | Ni           | 1.9571                                                   | 10                  | 19.57100                                                             | 47272.95                      | 4.69E+04              | 4.69% |
|                                                         | 0.02045        | 50                         |              | 1.8997                                                   | 10                  | 18.99700                                                             | 46447.43                      |                       |       |

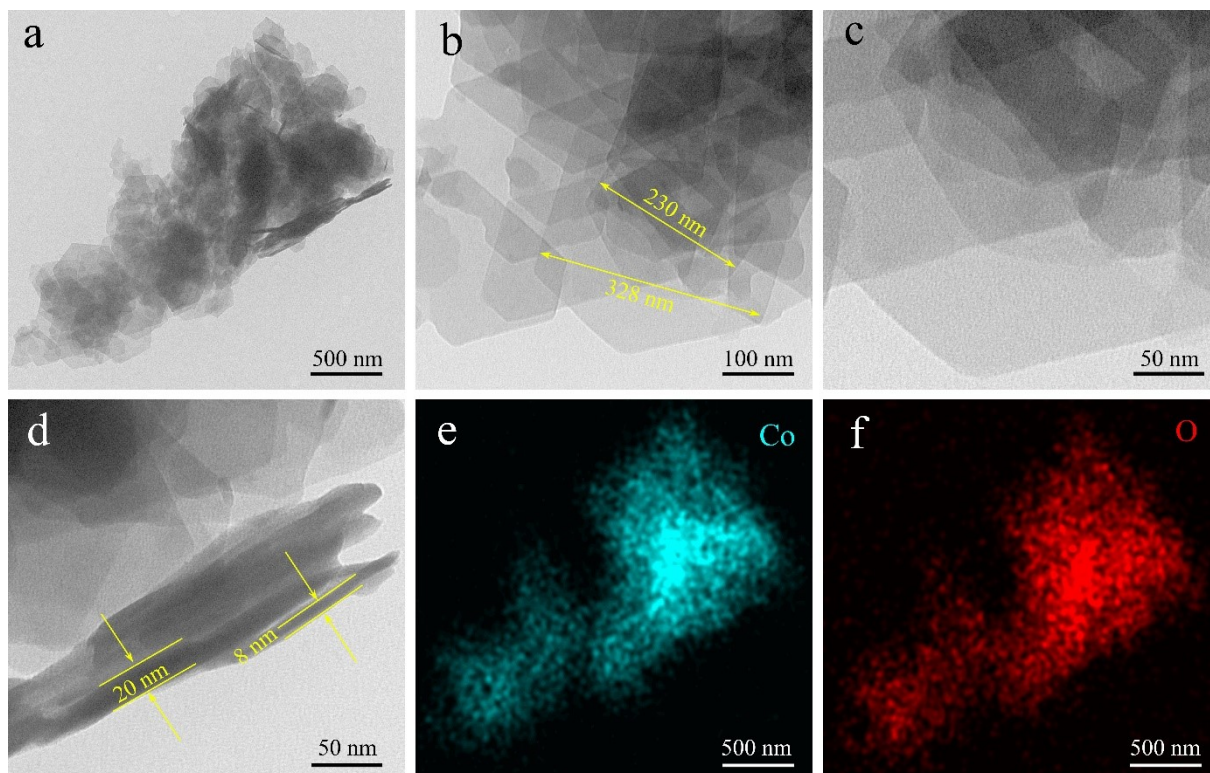

Fig. S2 (a), (b), (c), (d) TEM and elemental mapping of (e) Co, (f) O in  $\text{Co}_5(\text{O}_{9.48}\text{H}_{8.52})\text{NO}_3$

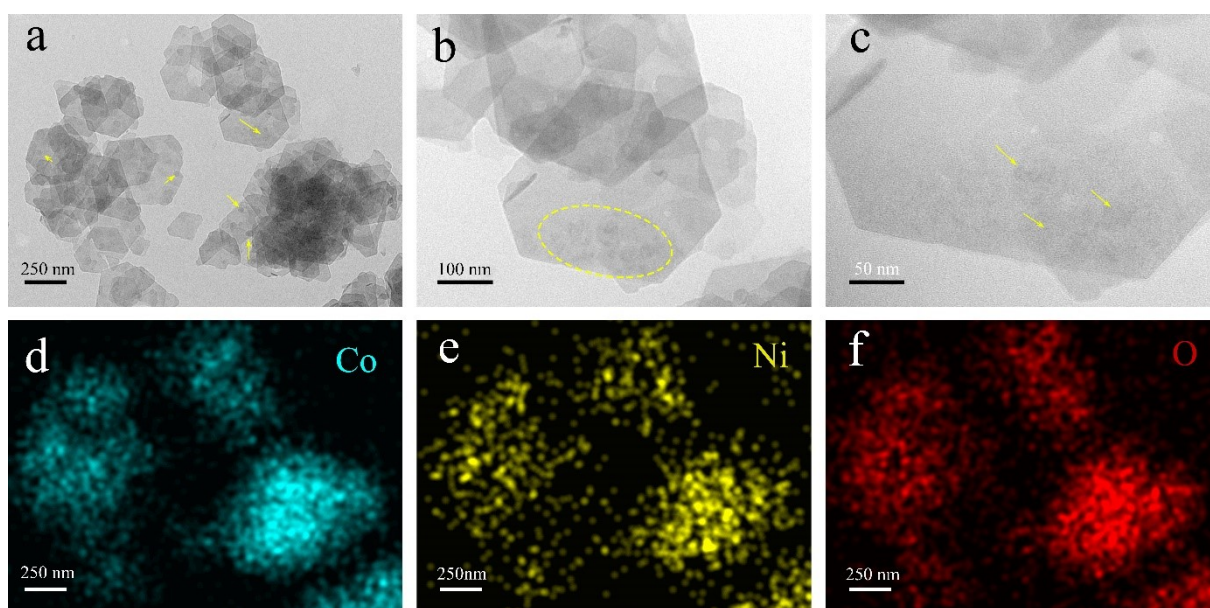

Fig. S3 (a), (b), (c) TEM and elemental mapping of (d) Co, (e) Ni, (f) O in

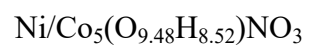

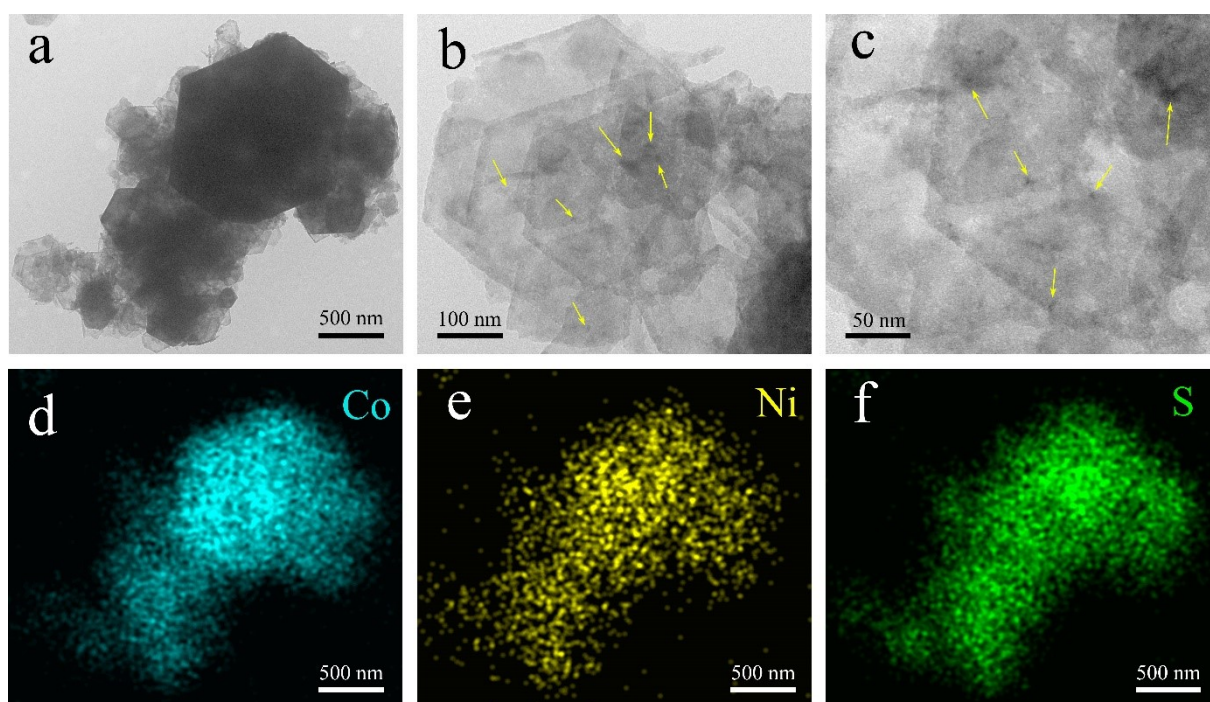

Fig. S4 (a), (b), (c) TEM and elemental mapping of (d) Co, (e) Ni, (f) S in  $\text{Ni}_3\text{S}_2/\text{Co}_3\text{S}_4$

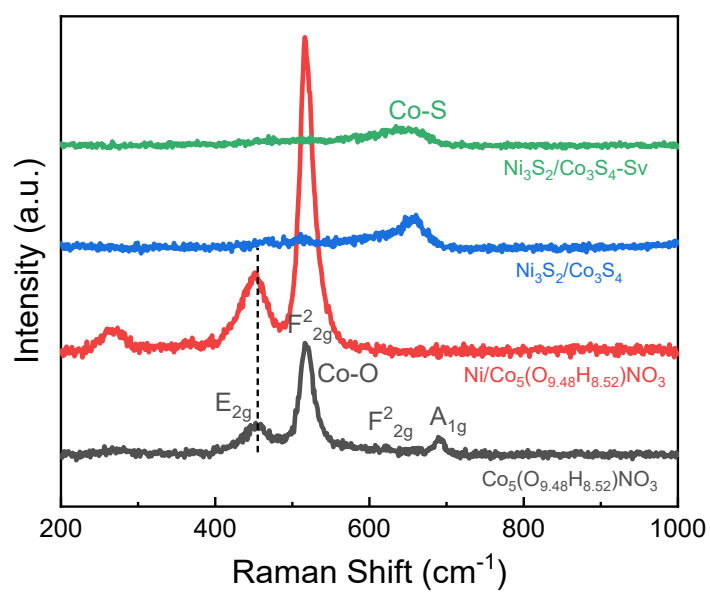

Fig. S5 Raman spectra of samples

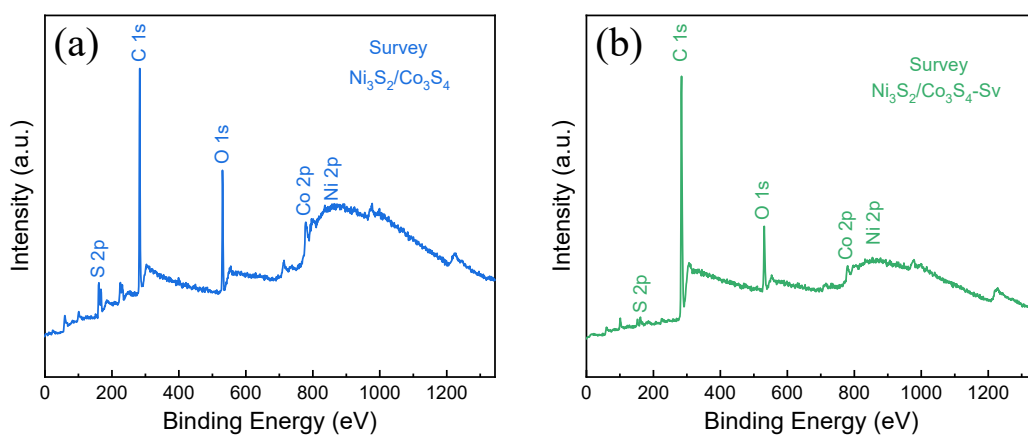

Fig. S6 The survey spectrum of XPS for (a)  $\text{Ni}_3\text{S}_2/\text{Co}_3\text{S}_4$ , (b)  $\text{Ni}_3\text{S}_2/\text{Co}_3\text{S}_4\text{-Sv}$

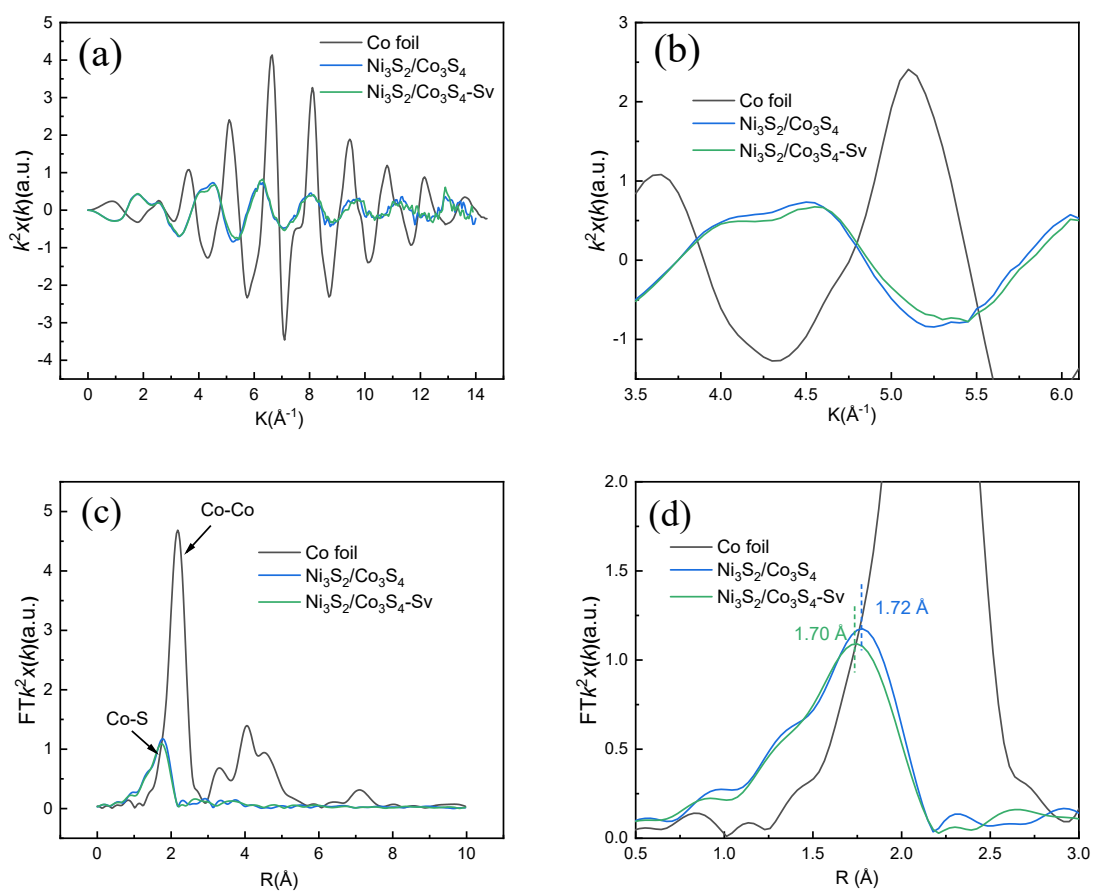

Fig. S7 Co K-edge EXAFS spectra of  $\text{Ni}_3\text{S}_2/\text{Co}_3\text{S}_4$  and  $\text{Ni}_3\text{S}_2/\text{Co}_3\text{S}_4\text{-Sv}$ : (a), (b) k-space spectra, (c), (d) R-space

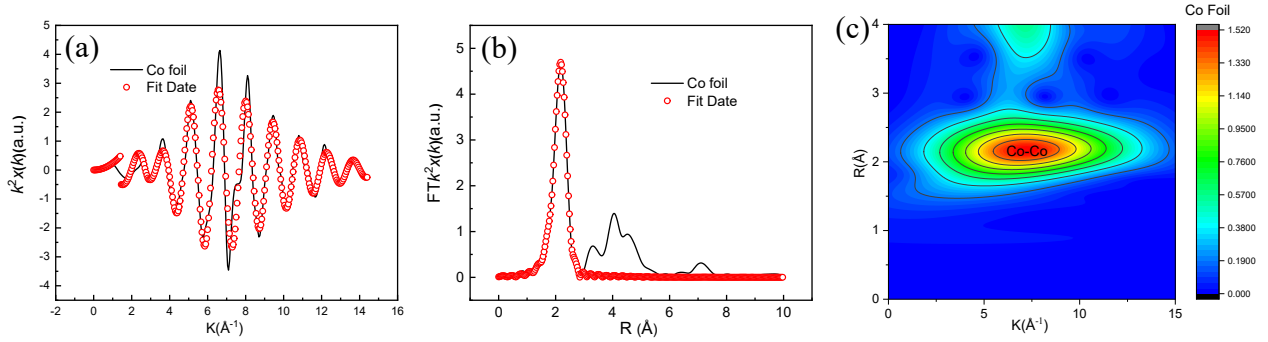

Fig. S8 Co K-edge EXAFS spectra of Co foil: (a) k-space spectra, (b) R-space, (c)

**Table S2** EXAFS fitting parameters at the Co K-edge for various samples ( $S_0^2=0.74$ )

| Sample                                                     | shell | CN      | R(Å)      | $\sigma^2$ | $\Delta E_0$ | R factor |
|------------------------------------------------------------|-------|---------|-----------|------------|--------------|----------|
| Co foil                                                    | Co-Co | 12*     | 2.49±0.01 | 0.0063     | 7.6±0.4      | 0.0021   |
| $\text{Ni}_3\text{S}_2/\text{Co}_3\text{S}_4\text{-Co}$    | Co-S  | 3.1±0.1 | 2.22±0.01 | 0.0053     | -5.0±1.1     | 0.0091   |
| $\text{Ni}_3\text{S}_2/\text{Co}_3\text{S}_4\text{-Sv-Co}$ | Co-S  | 2.8±0.1 | 2.20±0.01 | 0.0051     | -6.2±1.4     | 0.0123   |

### Fitting parameters of EXAFS

The obtained XAFS data was processed in Athena (version 0.9.26) for background, pre-edge line and post-edge line calibrations. Then Fourier transformed fitting was carried out in Artemis (version 0.9.26). The  $k^2$  weighting, k-range of 3 - 14  $\text{\AA}^{-1}$  and R range of 1 -  $\sim 3$   $\text{\AA}$  were used for the fitting of Co foil; k-range of 3 - 11.03  $\text{\AA}^{-1}$  and R range of 1 -  $\sim 2.5$   $\text{\AA}$  were used for the fitting of samples. The four parameters, coordination number, bond length, Debye-Waller factor and  $E_0$  shift (CN, R,  $\Delta E_0$ ) were fitted without anyone was fixed, the  $\sigma^2$  was set.

### Parameters for Wavelet Transform analysis

For Wavelet Transform analysis, the  $\chi(k)$  exported from Athena was imported into the Hama Fortran code. The parameters were listed as follow: R range, 1 - 4  $\text{\AA}$ , k range, 0 - 15  $\text{\AA}^{-1}$  for samples; k weight, 2; and Morlet function with  $\kappa=10$ ,  $\sigma=1$  was used as the mother wavelet to provide the overall distribution.

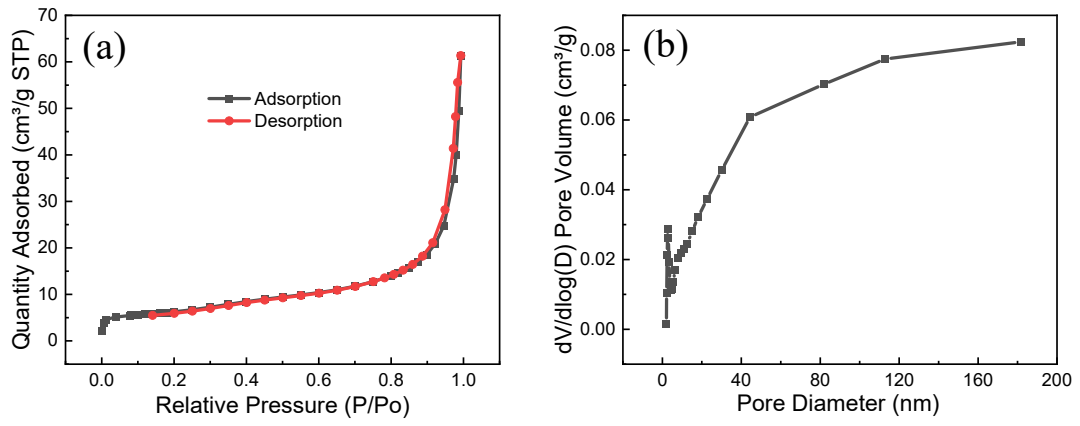

Fig. S9 (a) Nitrogen adsorption-desorption isotherm, (b) BJH pore size distribution of

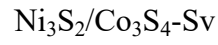

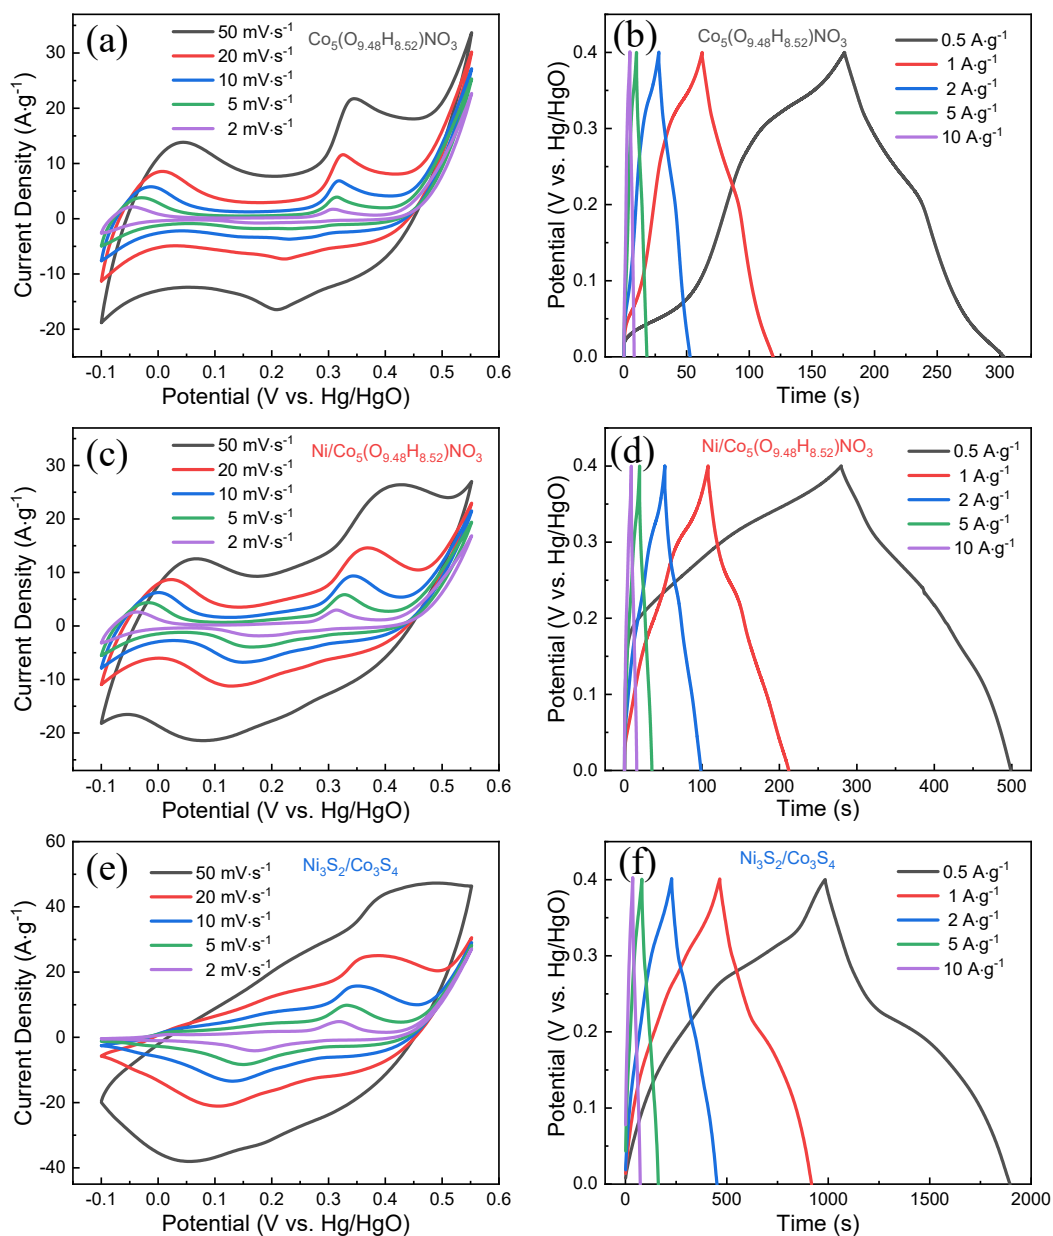

Fig. S10 CV curves at different scan rates of (a) the  $\text{Co}_5(\text{O}_{9.48}\text{H}_{8.52})\text{NO}_3$  electrode, (c) the  $\text{Ni}/\text{Co}_5(\text{O}_{9.48}\text{H}_{8.52})\text{NO}_3$  electrode, (e) the  $\text{Ni}_3\text{S}_2/\text{Co}_3\text{S}_4$  electrode, respectively. GCD profiles at different current densities of (b) the  $\text{Co}_5(\text{O}_{9.48}\text{H}_{8.52})\text{NO}_3$  electrode, (d) the  $\text{Ni}/\text{Co}_5(\text{O}_{9.48}\text{H}_{8.52})\text{NO}_3$  electrode, (f) the  $\text{Ni}_3\text{S}_2/\text{Co}_3\text{S}_4$  electrode, respectively.



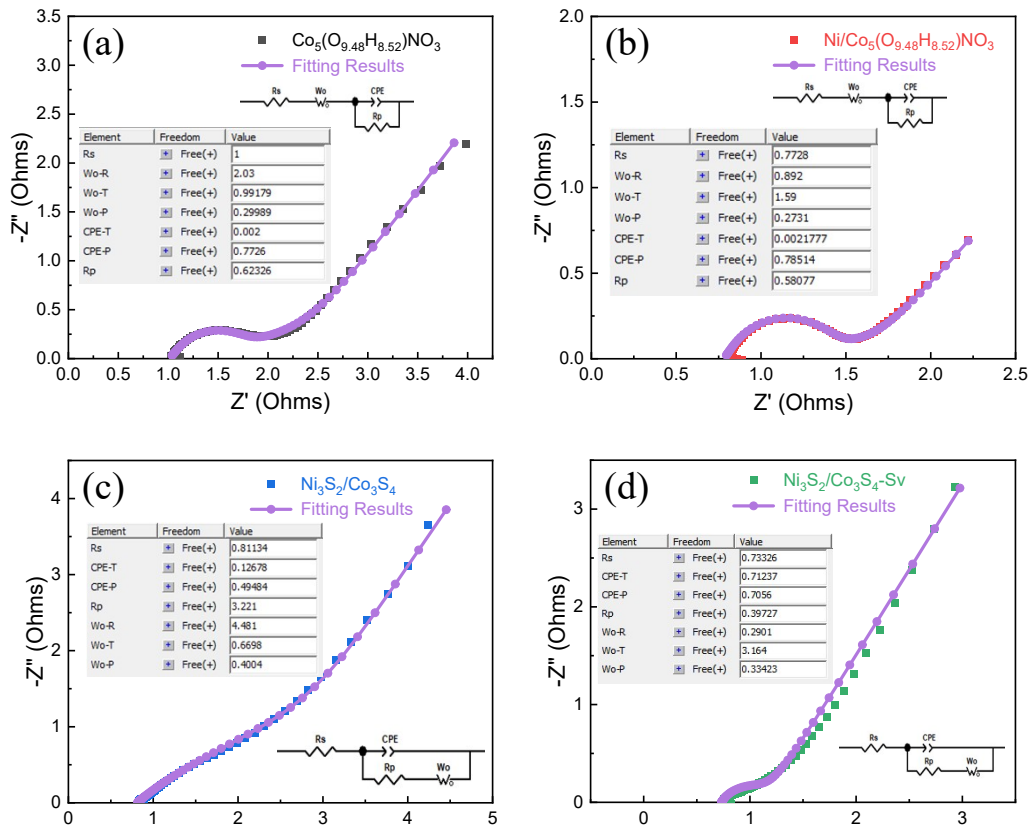

Fig. S11 The EIS fitting results and related equivalent circuit of samples.

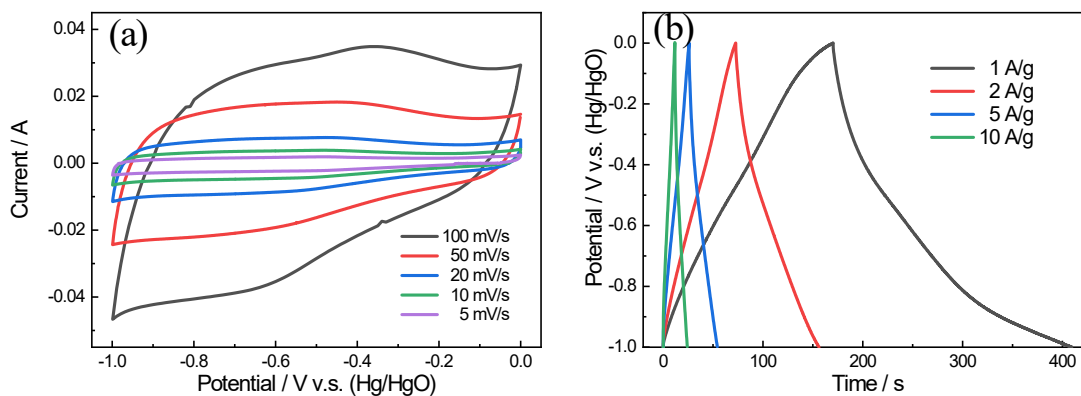

Fig. S12 (a) CV curves at different scan rates and (b) GCD profiles at varied current densities of the AC electrode

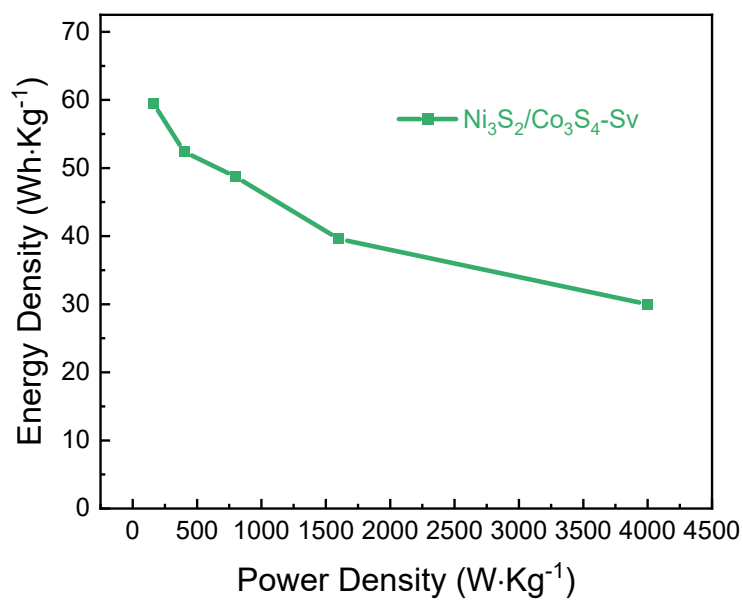

Fig. S13 The energy density vs. power density of  $\text{Ni}_3\text{S}_2/\text{Co}_3\text{S}_4\text{-Sv}$ //AC

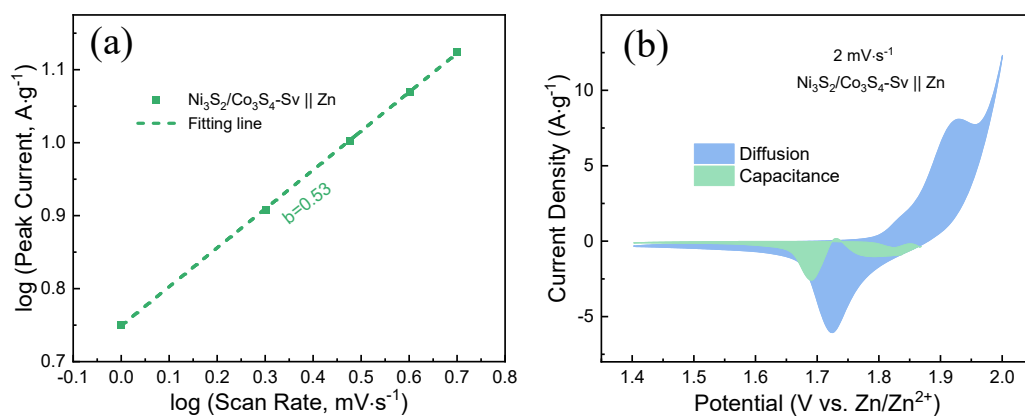

Fig. S14 (a) The plot of peak current vs. scanning rate; (b) Capacitive and diffusion-controlled contribution to charge storage of  $\text{Ni}_3\text{S}_2/\text{Co}_3\text{S}_4\text{-Sv} // \text{Zn}$

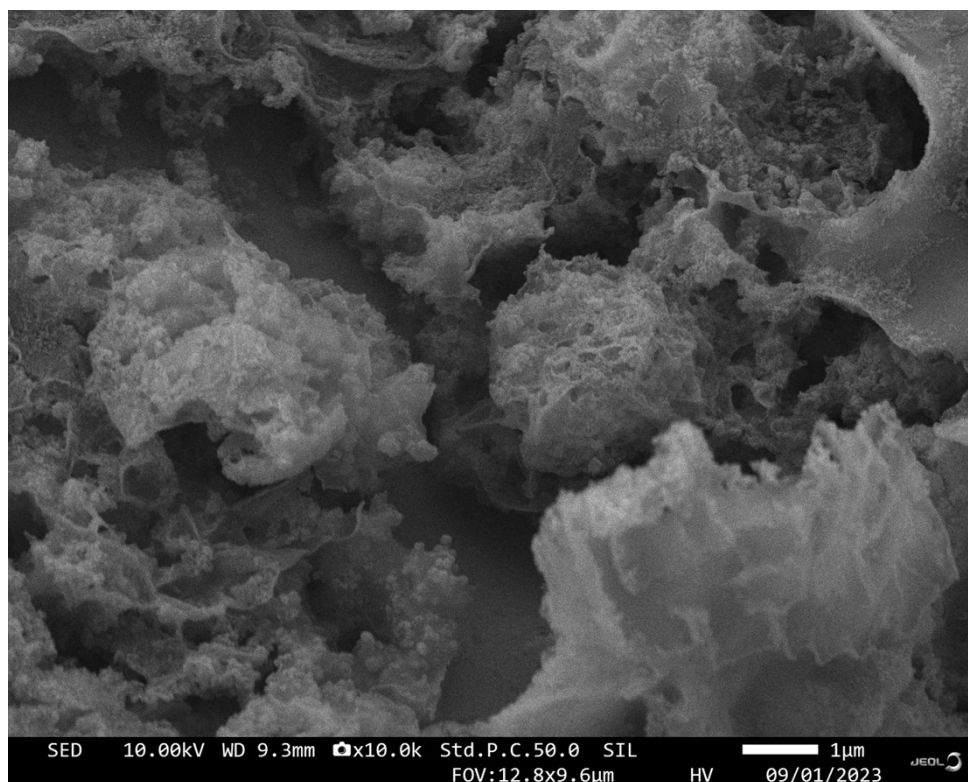

Fig. S15 The SEM image of  $\text{Ni}_3\text{S}_2/\text{Co}_3\text{S}_4\text{-Sv}$  after 2000 cycles

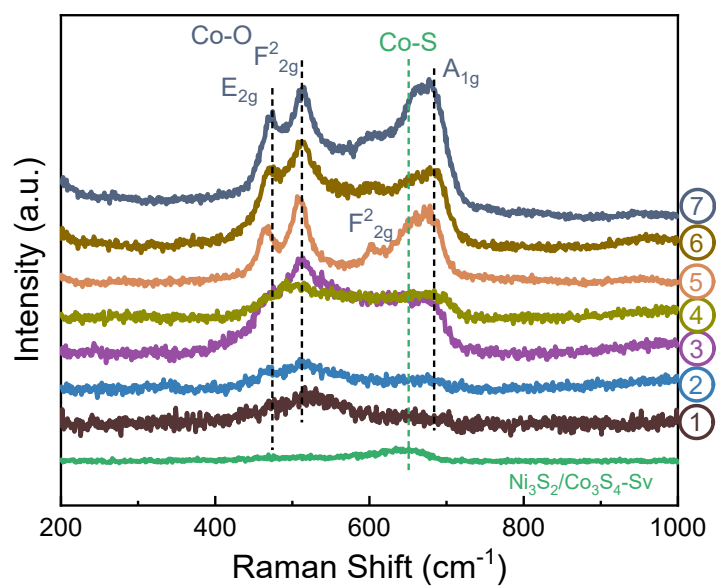

Fig. S16 Ex-situ Raman spectra of  $\text{Ni}_3\text{S}_2/\text{Co}_3\text{S}_4\text{-Sv}$  during charge/discharge process

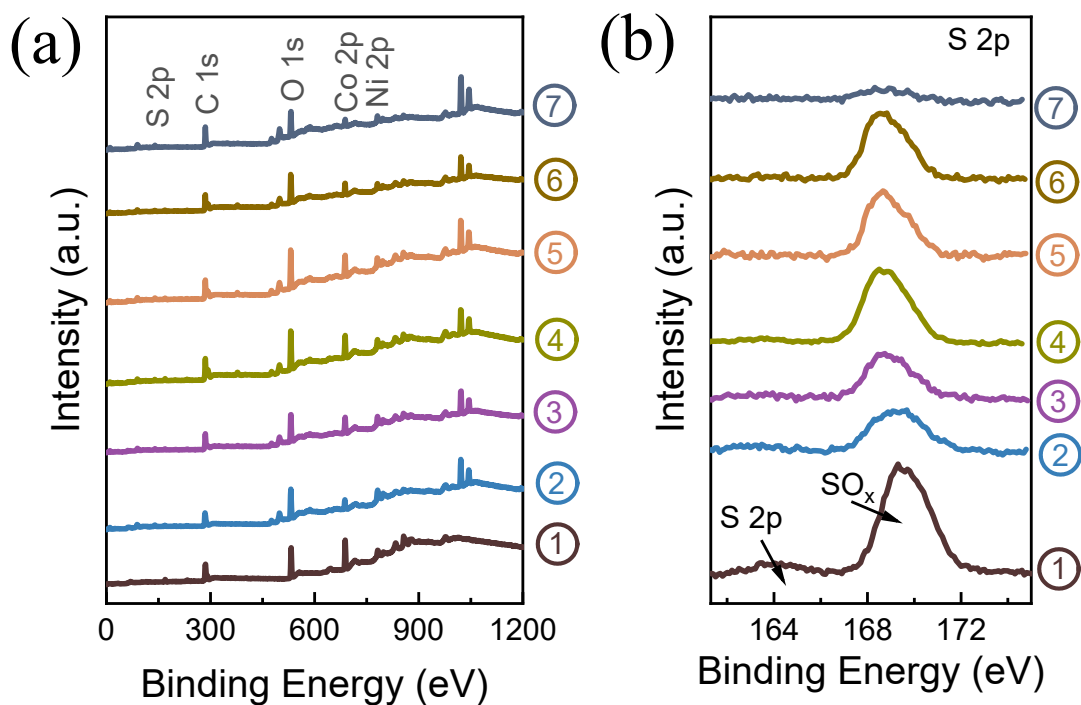

Fig. S17 Ex-situ XPS spectra of (a) survey spectra, (b) S 2p spectra

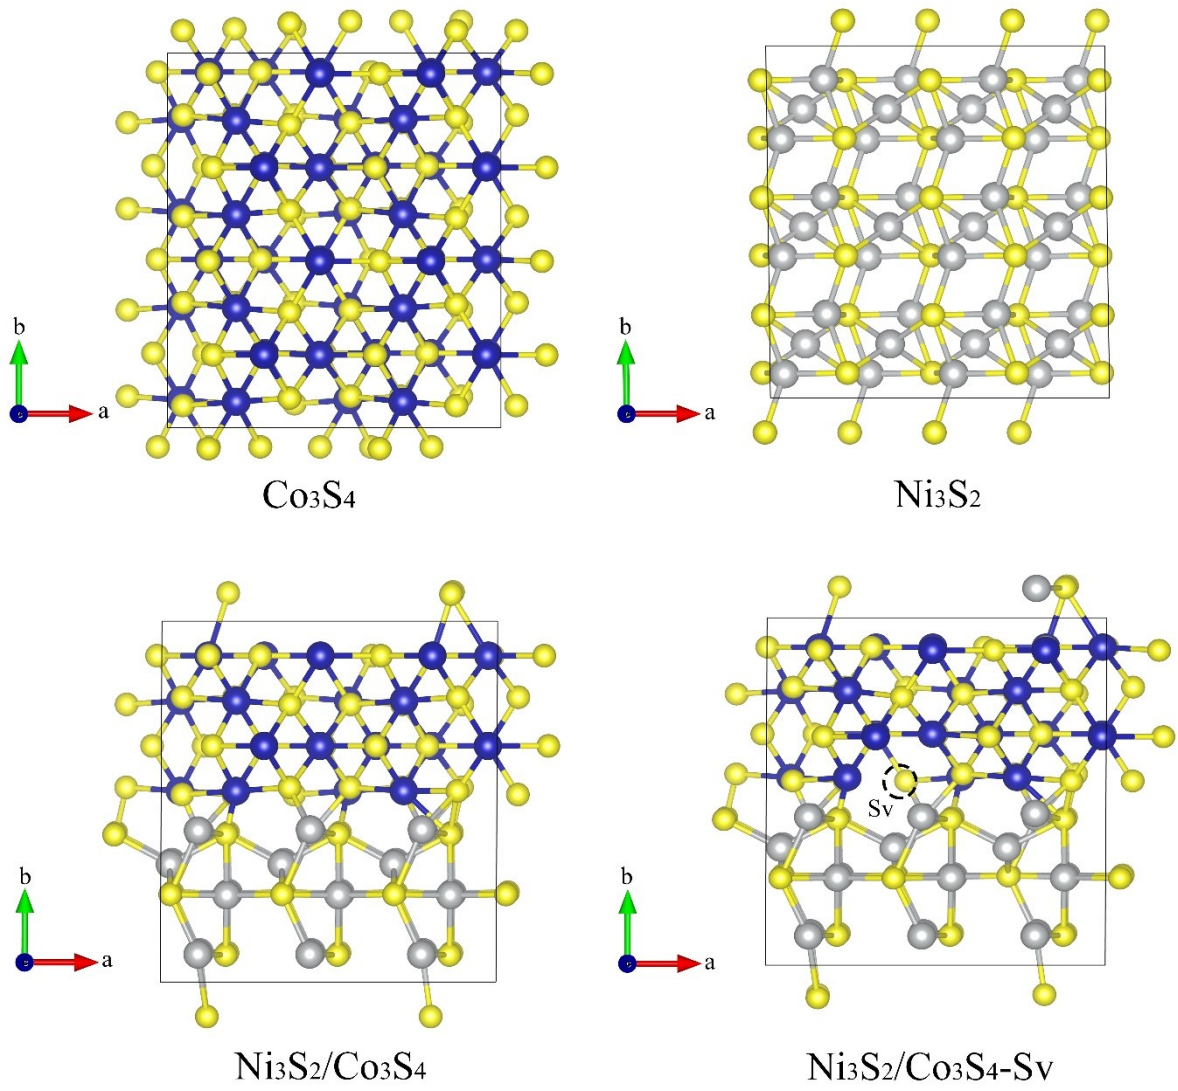

Fig. S18 Top-view models of (a)  $\text{Co}_3\text{S}_4$ , (b)  $\text{Ni}_3\text{S}_2/\text{Co}_3\text{S}_4$ , (c)  $\text{Ni}_3\text{S}_2/\text{Co}_3\text{S}_4\text{-Sv}$ , respectively.
